# Supplementary material for: Hazard Assessment Comparison of Tazhiping Landslide Before and After Treatment
Source: Copernicus journal article supplement (doi:10.5194/nhess-2016-391), 2017-01-10
Supplement: Supplementary file [file nhess-2016-391-AC6-supplement.pdf]

# Hazard Assessment Comparison of Tazhiping Landslide Before and After Treatment **using finite volume method**

Dong Huang<sup>1</sup>, **YuanJun Jiang<sup>1\*</sup>**, JianPing Qiao<sup>1</sup>, Meng Wang<sup>1</sup>

1. Key Laboratory of Mountain hazards and Surface process, Institute of Mountain hazards and Environment, Chinese Academy of Science, Chengdu 610041, China

\*Corresponding author ([yuanjun.jiang.civil@gmail.com](mailto:yuanjun.jiang.civil@gmail.com)).

**Abstract:** Through investigation and analysis of geological conditions and mechanical parameters of the Tazhiping landslide, the finite volume method was adopted, and, the rheological model was adopted to simulate the landslide and avalanche entire mass movement process. The present paper adopted **the numerical approach in RAMMS and** the GIS platform to simulate the mass movement process before and after treatment. This paper also provided the conditions and characteristic parameters of soil deposits (**thickness** flow height, **speed** velocity, and stresses) during the landslide mass movement process and mapped the 3D division of hazard zones before and after landslide treatment. Results indicated that the scope of hazard zones contracted after engineering treatment of the landslide. The extent of high-hazard zones was reduced by about 2/3 of the area before treatment, and characteristic parameters of the mass movement process after treatment decreased to 1/3 of those before treatment. Despite engineering treatment, the Tazhiping landslide still poses significant hazard to nearby settlements. Therefore, we propose that houses located in high-hazard zones be relocated or reinforced for protection.

**Keywords:** finite volume method; rheological model; motion feature parameters; hazard assessment

## 1. Introduction

The hazards of a landslide include scope of influence (i.e., source area, possible path area, and backward and lateral expansion area) and secondary disasters (i.e., reservoir surge, blast, and landslide-induced barrier lake). A typical landslide hazard assessment aims to propose a systematic hazard assessment method with regard to a given position or a potential landslide. Current research on typical landslide hazard assessment remains immature, and there are multiple methods for interpreting landslide hazards. To be specific, the scope of influence prediction of a landslide refers to deformation and instability characteristics such as sliding distance, movement speed, and bulking thickness range. The movement behavior of a landslide mass is related to its occurrence, sliding mechanisms, mass characteristics, sliding path, and many other factors. Current landslide movement prediction methods include empirical prediction and numerical simulation.

**Empirical prediction method:** The empirical prediction method involves

44 analyzing landslide flow through the collection of landslide parameters in the field. It  
45 further consists of the geomorphologic method (Costa, 1984; Jackson et al., 1987;  
46 Scott et al., 1993), the geometric change method (~~Zhang et al., 1994-1993~~; Finlay et  
47 al., 1999; Michael-Leiba et al., 2003), and the volume change method (Fannin et al.,  
48 2001). Empirical models are commonly simple and easy to apply, and the required  
49 data are easy to obtain as well. **Numerical simulation method:** Numerical simulation  
50 methods are further divided into the continuous deformation analysis method (Hung  
51 1995; Evans et al., 2009; ~~Zhang .Y, 2013~~; Wang-L, et al., 2016), the discontinuous  
52 deformation analysis method (Shi-G.H, 1988; ~~Yin et al., 2002~~), and the simplified  
53 analytical simulation method (Christen et al., 2010a; Sassa, 2010; Bartelt et al., 2012;  
54 Du et al., 2015). The numerical simulation method expresses continuous physical  
55 variables using the original spatial and temporal coordinates with geometric values of  
56 discrete points. Numerical simulations follow certain rules to establish an algebraic  
57 equation set in order to obtain approximate solutions for physical variables.

58 Empirical prediction models only provide a simple prediction of the sliding path.  
59 Due to the differences in geological environments, empirical prediction models  
60 commonly have low generality. The continuous deformation method has the  
61 advantage of an extremely strong replication capability, but it is not recommended  
62 when analyzing ~~flow-type~~ ~~landslides-debris flows~~, lahars, or debris flows because of  
63 complicated rheological behaviors (~~Iverson et al., 1997, 2001~~; ~~Hung et al., 2001~~;  
64 ~~Portilla et al., 2010~~; ~~Chen et al., 2014~~). The fluid mechanics-based discontinuous  
65 deformation method has several shortcomings such as, great computational burden,  
66 difficult parameter selection, and difficult 3D implementation. The simplified  
67 analytical simulation method fully takes into account the flow state properties of  
68 landslides before introducing a rheological model and can easily realize 3D  
69 implementation on the GIS platform. On that account, this paper adopted the  
70 continuous fluid mechanics-based finite volume method (simplified analytical  
71 simulation method). We introduce a rheological model on the basis of using mass as  
72 well as momentum and energy conservation to describe the movement of landslides.  
73 We also employed GIS analysis to simulate the entire movement process of Taziping  
74 landslide and map the 2D division of hazard zones.

## 76 2. Methods

### 77 2.1 Kinetic analysis method

78 Adopting the continuous fluid mechanics-based finite volume method, this paper  
79 took into account erosion action on the lower surface of the sliding mass and the  
80 change in frictional resistance within the landslide-debris flow in order to establish a  
81 computational model. The basic idea is to divide the calculation area into a series of  
82 non-repetitive control volumes, ensuring that there is a control volume around each  
83 grid point. Each control volume is then integrated by the unresolved differential  
84 equation in order to obtain a set of discrete equations. The unknown variable is the  
85 numerical value of the dependent variable at each grid point. To solve the integral of a  
86 control volume, we make a hypothesis about the change rule of values among grid

87 points, that is, about their piecewise distribution profile. The finite volume method  
 88 can satisfactorily overcome the finite element method's weakness of slow calculation,  
 89 and solve the problem of complex region processing. Thus, we adopted the finite  
 90 volume method to establish the kinematic model for the landslide flow process.

91 The core of the finite volume method is domain discretization. The finite volume  
 92 method uses discrete points as a substitute for continuous space. The physical  
 93 meaning of the discrete equation is the conservation of the dependent variable in a  
 94 finite control volume. Establishment of the conservation equation is based on the  
 95 continuous movement model, that is, the continuity hypothesis about landslide  
 96 substances. We divided the landslide mass into a series of units and made the  
 97 hypothesis that each unit has consistent kinematic parameters (speed at a depth,  
 98 density, etc.) and physical parameters (Fig.1). We also established an Eulerian  
 99 coordinate system-based conservation equation with regard to each control volume.

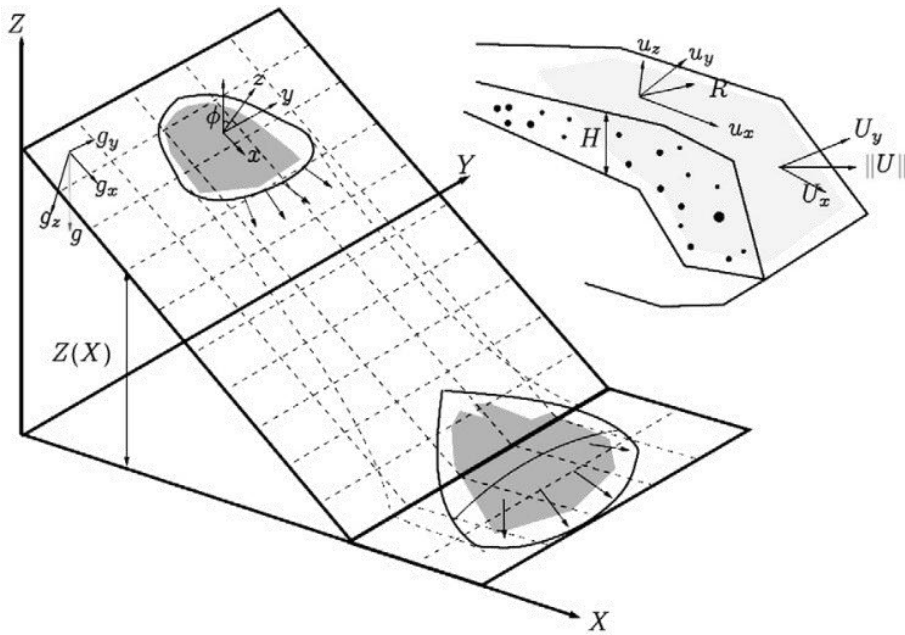

100

101 Fig.1 Schematic diagram of finite volume discretization (Christen et al., 2010a).

102

## 2.2 Control equation

103

The computational domain is defined as directions  $x$  and  $y$ , and the  
 104 topographic elevation is given the coordinate  $z(x, y)$ .  $H(x, y, t)$  is assumed as the

105

change relationship of landslide thickness with time;  $U_x(x, y, t)$  and  $U_y(x, y, t)$

106

respectively represent the mean movement speeds along directions  $x$  and  $y$  at

107

moment  $t$ ;  $n_x = U_x / \sqrt{U_x^2 + U_y^2}$  and  $n_y = U_y / \sqrt{U_x^2 + U_y^2}$  represent the cosinoidal and

108

sinusoidal flow vectors of the landslide on the plane  $x - y$ . The mean flow speed of

109 substances is defined as  $U = \sqrt{U_x^2 + U_y^2}$ .

110 Thus, the mass balance equation becomes:

$$111 \quad \partial_t H + \partial_x (HU_x) + \partial_y (HU_y) = \dot{Q} \quad (1)$$

112 wherein,  $\dot{Q}(x, y, t)$  represents the change rate (entrainment rate) of landslide  
113 volume with time.

114 Assuming that  $l(x, y, t)$  represents the movement distance of the landslide with  
115 time, we can obtain:

$$116 \quad \dot{Q} = \begin{cases} 0 & \text{if } h_i = 0 \\ \frac{\rho_i}{\rho_a} h_i \frac{U}{l} & \text{if } k_i l \geq h_i \\ \frac{\rho_i}{\rho_a} k_i U & \text{if } k_i l < h_i \end{cases} \quad (2)$$

117 wherein,  $h_i$  represents the thickness of the  $i$  th layer of the landslide in the  
118 movement process;  $\rho_i$  represents the density of the  $i$  th layer of the landslide in the  
119 movement process;  $\rho_a$  represents the density of the landslide; the dimensionless  
120 parameter  $k_i$  represents the entrainment rate.

121 The momentum balance equation is:

$$122 \quad \partial_t (HU_x) + \partial_x (HU_x^2 + \frac{g_z k_{a/p} H^2}{2}) + \partial_y (HU_x U_y) = S_{gy} - S_f(R) [n_x] \quad (3)$$

$$123 \quad \partial_t (HU_y) + \partial_y (HU_y^2 + \frac{g_z k_{a/p} H^2}{2}) + \partial_x (HU_x U_y) = S_{gx} - S_f(R) [n_y] \quad (4)$$

124 wherein,  $S_{gx} = g_x H$  and  $S_{gy} = g_y H$  represent the dynamic components of the  
125 acceleration of gravity in directions  $x$  and  $y$ ;  $g = (g_x \ g_y \ g_z)$  represents the  
126 vector of the acceleration of gravity;  $k_{a/p}$  represents the pressure coefficient of soil;  
127  $\rho_a$  represents the density of the landslide; the dimensionless parameter  $k_i$   
128 represents the entrainment rate;  $S_f(R)$  represents the frictional resistance.

129 The kinetic energy balance equation is:

$$130 \quad \partial_t (HR) + \partial_x (HRU_x) + \partial_y (HRU_y) = \dot{P} - \dot{D} \quad (5)$$

131 wherein,  $R(x,y,t)$  represents the random mean kinetic energy of the landslide;  
 132  $\dot{P}(x,y,t)$  and  $\dot{D}(x,y,t)$  represent the random increased kinetic energy and decreased  
 133 kinetic energy of the landslide.

### 134 2.3 Constitutive relationship

135 The improved Voellmy rheological model is applied in the computational  
 136 simulation of the landslide. See the computational formula below:

$$137 \quad S_f = \frac{u_i}{\|U\|} (h\mu g_z + R_l U^2 + R_\zeta U^2) \quad (6)$$

$$138 \quad R_l = \mu h \frac{U^T K U}{U^2}, R_\zeta = \frac{g}{\zeta} \quad (7)$$

139 wherein,  $u_i/\|U\|$  represents the unit vector in the movement direction of the  
 140 landslide;  $\mu$  represents the Coulomb friction coefficient, and is related to  $R(x,y,t)$ ,  
 141 the random mean kinetic energy of the landslide;  $R_l$  represents the gravity-related  
 142 frictional force coefficient;  $K$  represents the substrate surface curvature;  $\zeta$   
 143 represents the viscous friction coefficient of the ‘‘turbulent flow’’.

### 144 2.4 HLLE-Heun numerical solution

145 Synthesizing control equations (1), (3), (4) and (5), we can obtain the simplified  
 146 form of the nonlinear hyperbola equation:

$$147 \quad \partial_t V + \nabla \cdot F(V) = G(V) \quad (8)$$

$$148 \quad V = \begin{pmatrix} H \\ HU_x \\ HU_y \\ HR \end{pmatrix} \quad G(V) := \begin{pmatrix} \dot{Q} \\ S_{gx} - S_{fx} \\ S_{gy} - S_{fy} \\ \dot{P} - \dot{D} \end{pmatrix}$$

$$149 \quad F(V) = \begin{pmatrix} HU_x & HU_y \\ HU_x^2 + g_z k_{alp} \frac{H^2}{2} & HU_x U_y \\ HU_x U_y & HU_y^2 + g_z k_{alp} \frac{H^2}{2} \\ HRU_x & HRU_y \end{pmatrix}$$

150 wherein,  $V(x,y,t)$  represents a vector equation consisting of four unknown  
 151 vector variables;  $F(V)$  represents the flux function;  $G(V)$  represents the source  
 152 term. Based on the HLLE equation of the finite volume method and the quadrilateral  
 153 grid, the node layout can adopt the grid center pattern, and the normal flux along one  
 154 side of the control volume can be represented by the flux at the center of the side. The

155 finite volume discretization adopting the control volume as unit is depicted in Fig.1;  
 156 the Gauss theorem can be followed for the integration of equation (8), wherein  $C_i$   
 157 represents the unit volume; after converting the volume integral flux function  $F(V)$   
 158 into the curved surface integral, we can obtain:

$$159 \quad \int_{C_i} \partial_i V dx + \oint_{\partial C_i} F(V) \cdot n_i d\sigma = \int_{C_i} G(V) dx \quad (9)$$

160 wherein,  $n_i$  represents the outward normal direction vertical to unit  $C_i$  at the  
 161 boundary; through adopting the HLL format for the discretization of surface integral,  
 162 the following simplified form can be obtained:

$$163 \quad V_i^{(*)} = V_i^{(n)} + \frac{\Delta t}{A_{C_i}} \Delta F_i^{(HLL)}(V^{(n)}) \quad (10)$$

$$164 \quad V_i^{(**)} = V_i^{(*)} + \frac{\Delta t}{A_{C_i}} \Delta F_i^{(HLL)}(V^{(*)}) \quad (11)$$

$$165 \quad V_i^{(n+1)} = \frac{1}{2} (V_i^{(n)} + V_i^{(**)}) \quad (12)$$

166 wherein,  $V_i^{(n)}$  represents the mean value of unit variables at moment  $t^{(n)}$ ;  $V^{(n)}$   
 167 represents the mean value of the entire grid at moment  $t^{(n)}$ ;  $\Delta t := t^{(n-1)} - t^{(n)}$  represents  
 168 the calculated time step;  $A_{C_i}$  represents the area of unit  $C_i$ ;  $\Delta F_i^{(HLL)}$  represents the  
 169 approximate value of the curved surface integral, as shown below:

$$170 \quad \Delta F_i^{(HLL)}(V^{(n)}) := - \sum_{j=1}^4 F_{ij}^{(HLL)}(V^{(n)}) n_{ij} \Delta X \quad (13)$$

171 wherein,  $n_{ij}$  represents the outward normal direction of the  $i$  th unit at  
 172 boundary  $j$ ; the flux calculation term  $F_{ij}^{(HLL)}(V^{(n)})$  represents the approximate  
 173 solution mode of the Riemann problem of the  $i$  th unit at boundary  $j$ ; see the  
 174 computational formula below:

$$175 \quad F_{ij}^{(HLL)}(V^{(n)}) = \begin{cases} F(V_L^{(n)}) & 0 \leq S_L \\ \frac{S_R F(V_L^{(n)}) - S_L F(V_R^{(n)}) + S_R S_L F(V_R^{(n)} - V_L^{(n)})}{S_R - S_L} & S_L \leq 0 \leq S_R \\ F(V_R^{(n)}) & S_R \leq 0 \end{cases} \quad (14)$$

176 wherein,  $V_L^{(n)}$  and  $V_R^{(n)}$  respectively represent the approximate values of  $V^{(n)}$

177 on both sides of boundary  $j$  of the  $i$  th unit;  $S_L$  and  $S_R$  respectively represent the  
178 wave speeds on the left and right sides. Refer to the computational method described  
179 by Toro (1992). In addition, the gradient magnitude in the original second-order  
180 difference equation can be limited through multiplication with the flux limiter, and the  
181 second-order format of the TVD property can be constructed to avoid the occurrence  
182 of numerical oscillation. Refer to the specific method described by LeVeque (2002).

183 In this paper numerical solver used within RAMMS, which was specifically  
184 designed to provide landslide(avalanche) engineers with a tool that can be applied to  
185 analyze problems that two-dimensional depth-averaged mass and momentum  
186 equations on three-dimensional terrain using both first and second-order finite volume  
187 methods (Christen et al., 2010b).

### 188 **3. Study area and data**

#### 189 **3.1 Taziping landslide**

190 Taziping landslide is located in the southeast of the Hongse Village, Hongkou  
191 Town, Dujiangyan City of Sichuan Province. The site is located at (E103°37'46",  
192 N31°6'29"), 68 km away from Chengdu City to the east and 20 km away from the  
193 Dujiangyan Urban District (Fig. 2). Its geomorphic unit is a middle-mountain tectonic  
194 erosion area, falling within the slope geomorphology on the right bank of the Baisha  
195 River Valley. As an colluvial layer landslide triggered by the Wenchuan Earthquake,  
196 Taziping Landslide is a large-scale landslide as shown in Fig. 3. It has a gradient of  
197 25°-40° with an average of about 32°. The landslide has an apparent round-backed  
198 armchair contour, and has formed a steep rear edge, which has a gradient of 35°-50°  
199 and an elevation of about 1,370 m. The front edge is located on the south side of the  
200 mountain road, and has an elevation of about 1,007 m. The landslide has an elevation  
201 difference of about 363 m, and the main sliding direction of 124°NE. The landslide  
202 mass is in an irregular semi-elliptical shape, and has a length of about 530 m, an  
203 average width of 145 m and a landslide area of approximately  $7.68 \times 10^4$  m<sup>2</sup>. The  
204 landslide mass is gravelly soil in lithology, and is covered on the surface by silty clay  
205 mingled with gravels. In terms of spatial distribution, it is thick in the middle and thin  
206 on the lateral edges, and has a thickness of 20-25 m and a volume of approximately  
207  $1.16 \times 10^6$  m<sup>3</sup>. During the earthquake, the landslide mass slid to cover the northern  
208 mountain slope mass of the Hongse Village Miaoba settlement. The landslide has an  
209 apparent front edge boundary, and there is also a swelling deformation (Fig. 4).

210

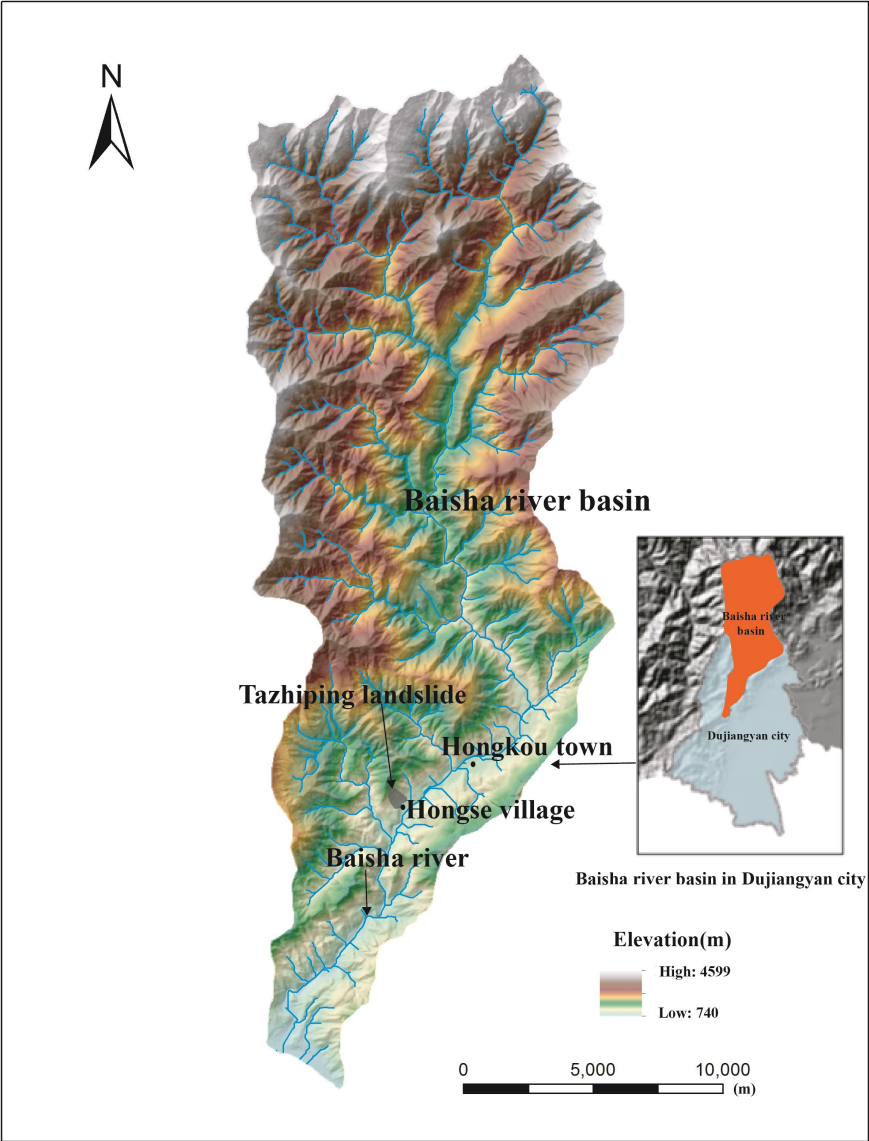



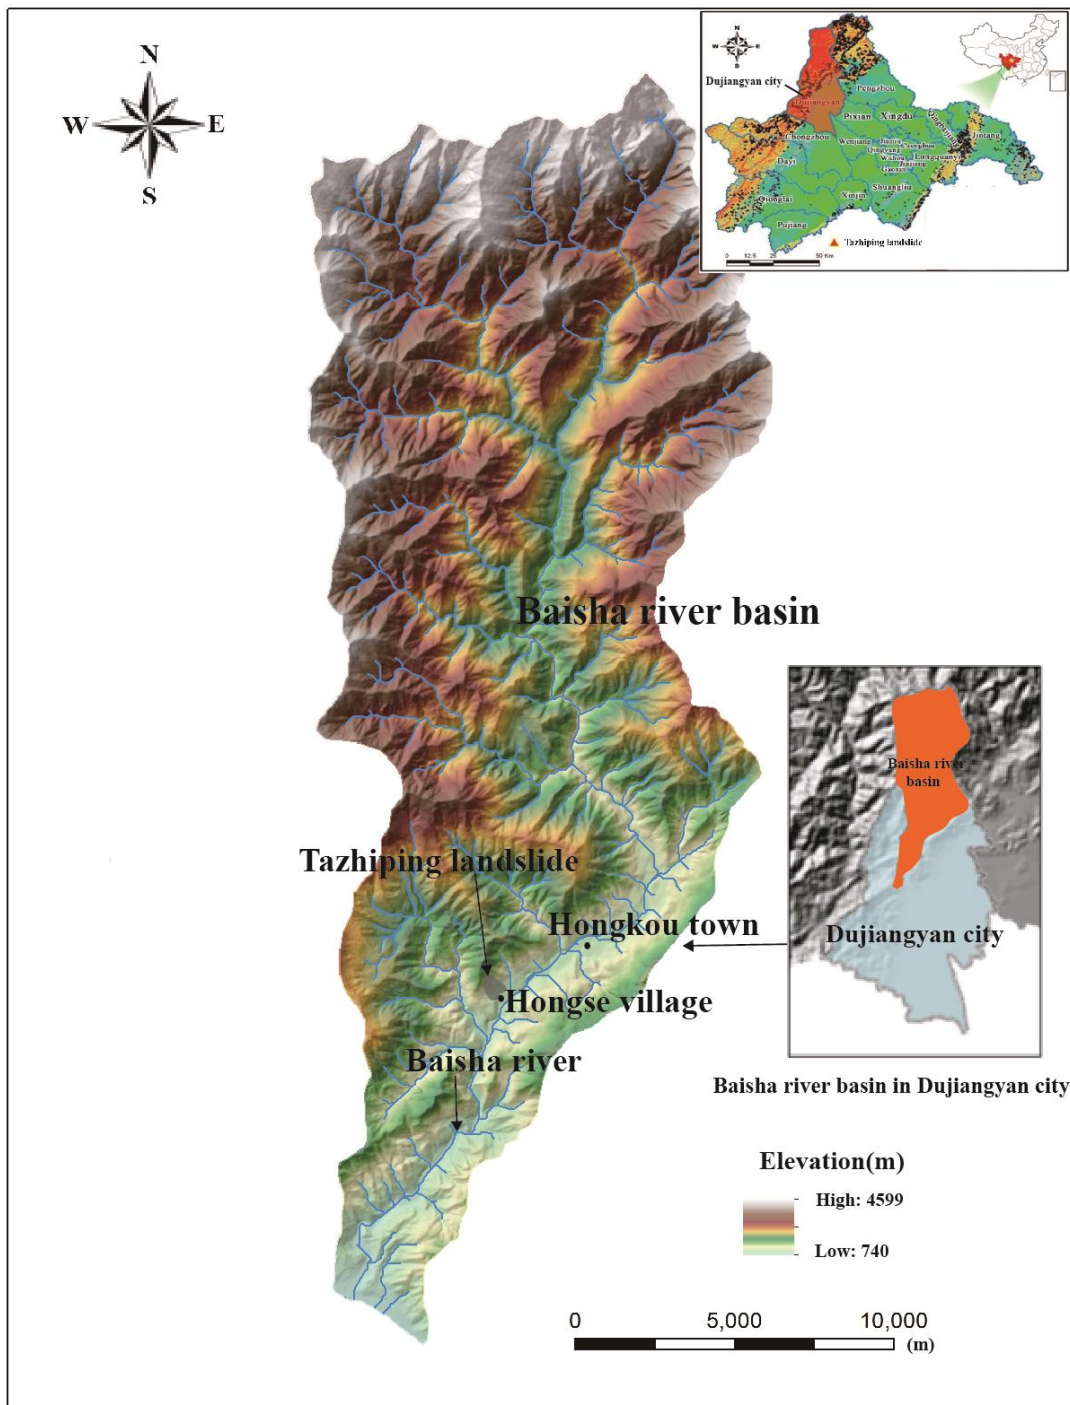

212  
 213  
 214

Fig.2 Location of Tazhiping landslide, Baisha river basin, Dujiangyan city (the landslide triggered by Wenchuan Ms 8.0 earthquake on May 12, 2008)

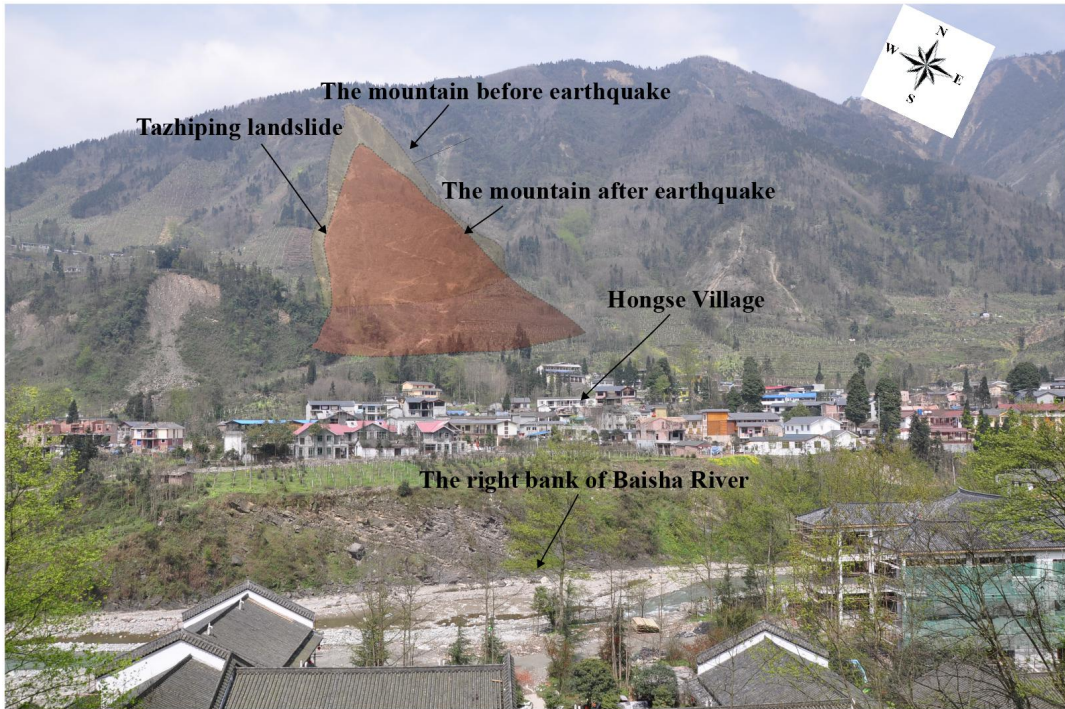

215

216

Fig.3 Tazhiping Landslide

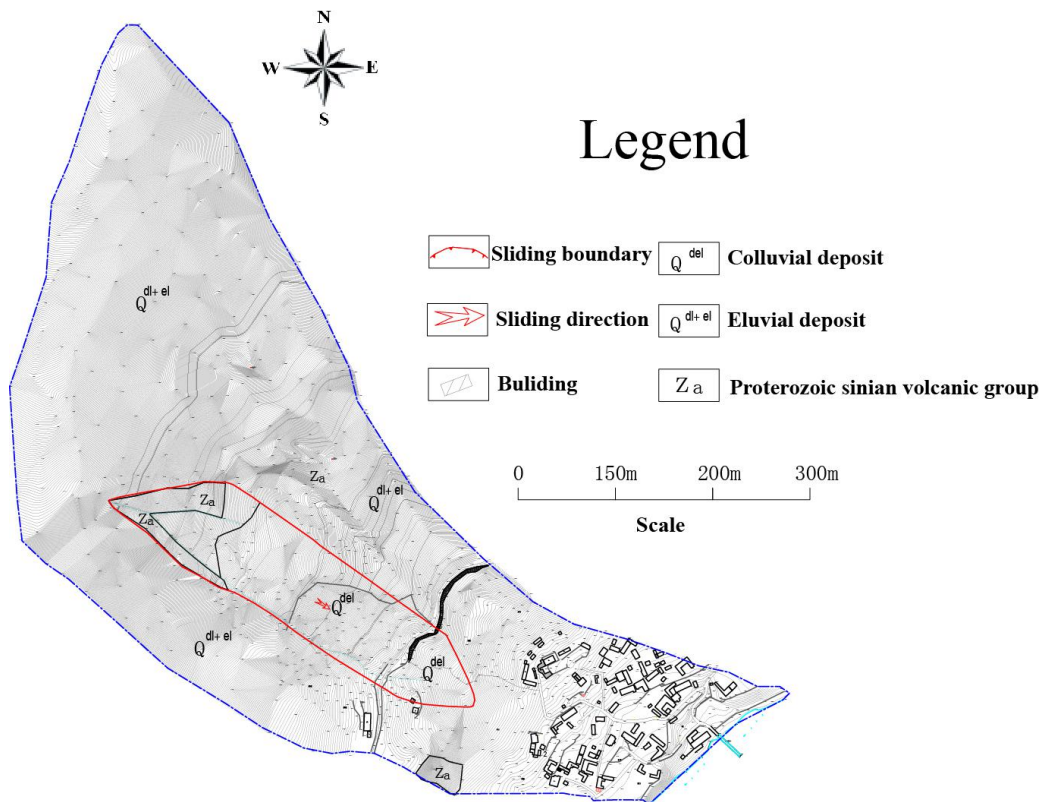

217

218

**Fig.4 Plane sketch of Tazhiping landslide**

219

220

221

After Wenchuan Earthquake, the massive colluvial deposits covers on the mountain slope, and the landslide mass is dominated by the colluvium. The colluvium is mainly distributed on the top surface of the landslide mass in the thickness of

222 0.5-5.0 m, and is mainly constituted by rubbles and gravels. The mass consists of a  
 223 small amount of fine gravel substances which are gray or grayish-green, and  
 224 dominated by andesite in composition, generally with a block size of 20-150 cm.  
 225 Field survey indicates that the rubbles in the surface layer have a maximum diameter  
 226 exceeding 2 m, and that fine gravel substances are filled among rubbles in a loose  
 227 structure. Within the thickness of 5-10 m, the landslide mass is constituted of a small  
 228 amount of yellowish-brown and gray-brown silty clay mingled with 5-40% of  
 229 non-uniformly distributed broken rubbles. Within the thickness of 10-25 m, there is a  
 230 wide distribution of gravelly soil. The soil is grayish-green or variegated in color, is  
 231 slightly compact and non-uniform, and has a broken stone content of about 50%. The  
 232 parent rock of the broken stones is andesite, filled with silty clay or silt (Fig.4 5).  
 233 Table 1 shows the parameters of the surface gravelly soil of the landslide mass based  
 234 on the field sampling.

235 Tab.1 Parameters of the surface soil of Taziping Landslide

| Internal friction angle<br>(°) |          | Cohesion<br>(kPa) | Relative<br>compactness | Natural<br>void ratio | Dry density<br>(kN·m <sup>-3</sup> ) | Specific gravity<br>(g·cm <sup>-3</sup> ) |
|--------------------------------|----------|-------------------|-------------------------|-----------------------|--------------------------------------|-------------------------------------------|
| Peak                           | Residual |                   |                         |                       |                                      |                                           |
| 27.5                           | 23       | 20.5              | 53%                     | 0.789                 | 15.357                               | 2.492                                     |

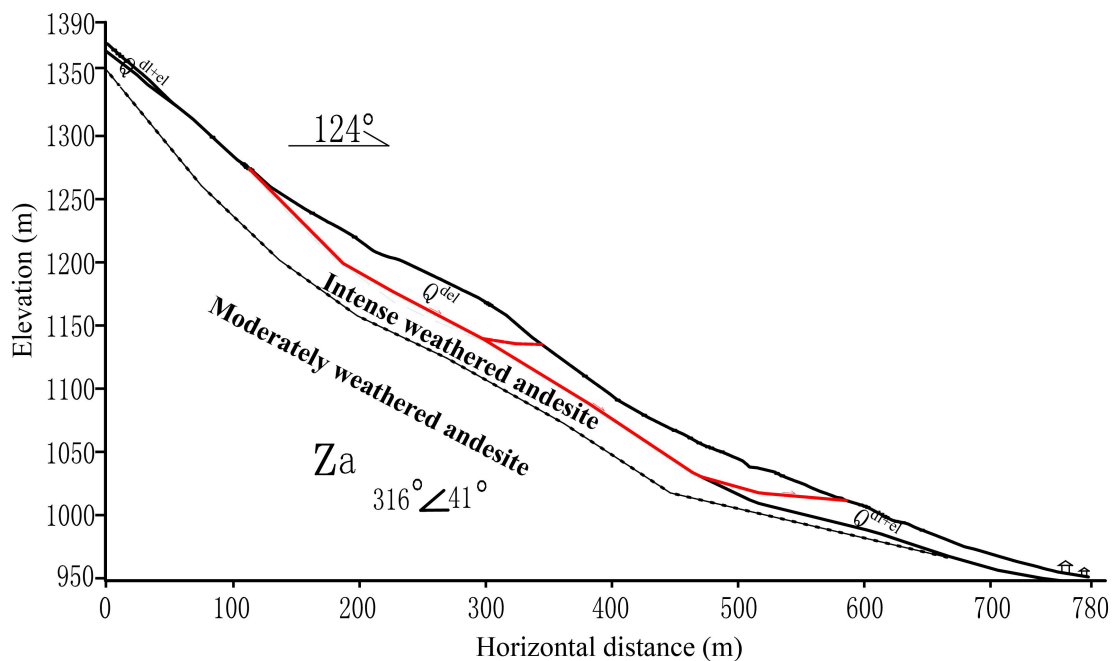

236 237

238 Fig.4-5 Geological profile of Taziping Landslide

238 The landslide is an unconsolidated mass containing relatively large amounts of  
 239 crushed stones and silty clay (Fig.5 6). Its loose structure and strong permeability  
 240 facilitate infiltration of surface water. The Wenchuan earthquake aggravated the  
 241 deformation of the landslide making deposits more unconsolidated, further reducing  
 242 the stability of the landslide mass. During persistent rainfall, surface water infiltrates

243 the landslide slope resulting in increased water pressure within the landslide mass and  
244 reduced shear strength on the sliding surface. Thus, rainfall constitutes the primary  
245 inducing factor of the upper Taziping landslide. After infiltrating the loose layer, water  
246 saturates the slope increasing the dead weight of the sliding mass and reducing the  
247 shear strength of soil in the sliding zone. Infiltration into the landslide mass also  
248 increases the infiltration pressure of perched water, drives deformation, and poses a  
249 great threat to villages located at the front of the landslide. Slide-resistant piles and  
250 backfill were placed at the toe of the slope in order to reduce the hazards of future  
251 slides. The slide-resistant piles have enhanced the overall stability of the slope,  
252 however, under heavy rainfall the upper unconsolidated landslide deposits may cut  
253 out from the top of the slide-resistant piles.

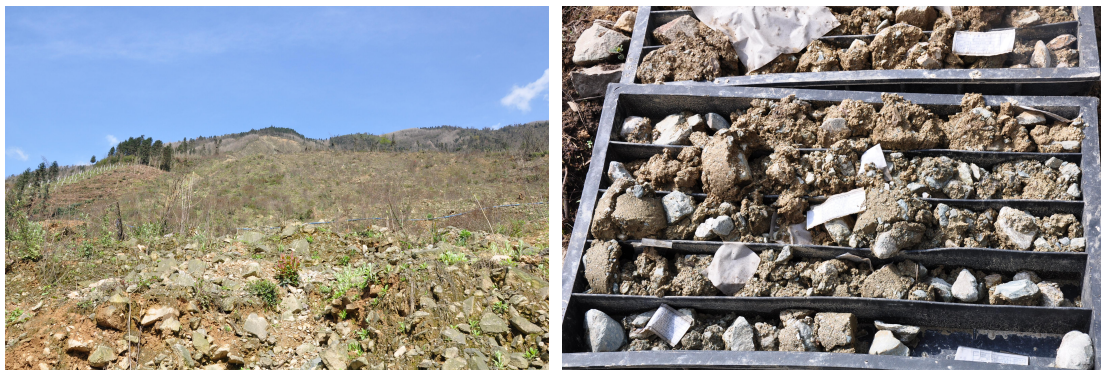

254  
255 (a) Material on the landslide surface (b) Material in the shear zone

256 Fig.5-6 Colluvial deposits covers on the mountain slope

257 Therefore we simulate possible movement states of the Taziping landslide before  
258 and after treatment with slide-resistant piles, comparatively analyzed the kinetic  
259 parameters in the movement process, and mapped the 3D division of hazard zones.

### 260 261 3.2 Hazard prediction before treatment

262 It was assumed that the landslide was damaged before engineering treatment.  
263 According to field investigation, the sliding mass had an estimated starting volume of  
264 about 600,000m<sup>3</sup> and a mean thickness of 8m. Based on the survey report and field  
265 investigation (Hydrologic Engineering and Geological Survey Institute of Hebei  
266 Province, 2010), we adopted the survey parameters of Tab.2 for the simulated  
267 calculation. These parameters obtained from performing laboratory or small-scale  
268 experiments and back-analyses of relatively well-documented landslide cases. The  
269 unit weigh  $\gamma = 20.8kN \cdot m^{-3}$  which we used is from small-scale conventional  
270 triaxial test experiments in laboratory. In addition, we selected the coulomb friction  
271 coefficient  $\mu = 0.45$  and viscous friction coefficient  $\zeta = 500m \cdot s^{-2}$  in accordance  
272 with back-analyses of well-documented landslide cases (Cepeda et al., 2010; Du et al.,  
273 2015). The erosional entrainment rate selected the minimum value  $k_i = 0.0001$  in  
274 program RAMMS.

Tab.2 Model calculation parameters

| Unit weight<br>$\gamma(kN \cdot m^{-3})$ | Coulomb friction<br>coefficient<br>$\mu$ | Viscous friction<br>coefficient<br>$\zeta(m \cdot s^{-2})$ | Erosional entrainment<br>rate<br>$k_i$ |
|------------------------------------------|------------------------------------------|------------------------------------------------------------|----------------------------------------|
| 20.8                                     | 0.45                                     | 500                                                        | 0.0001                                 |

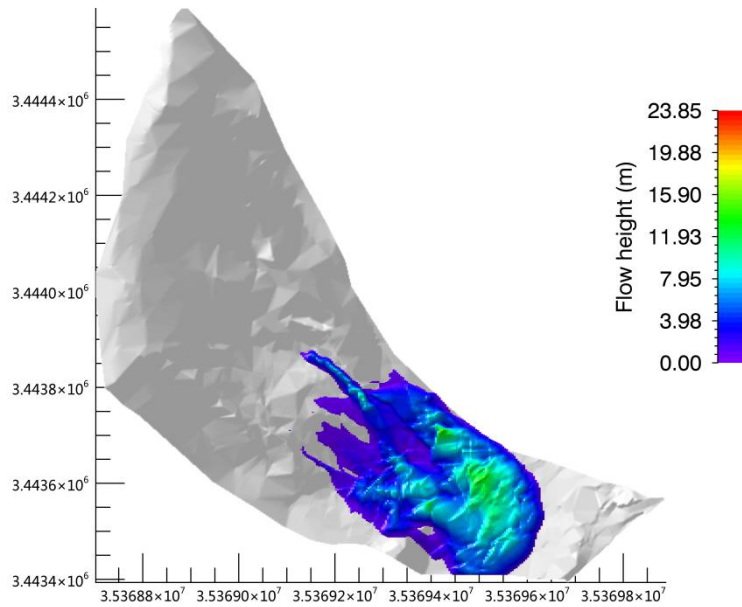

276

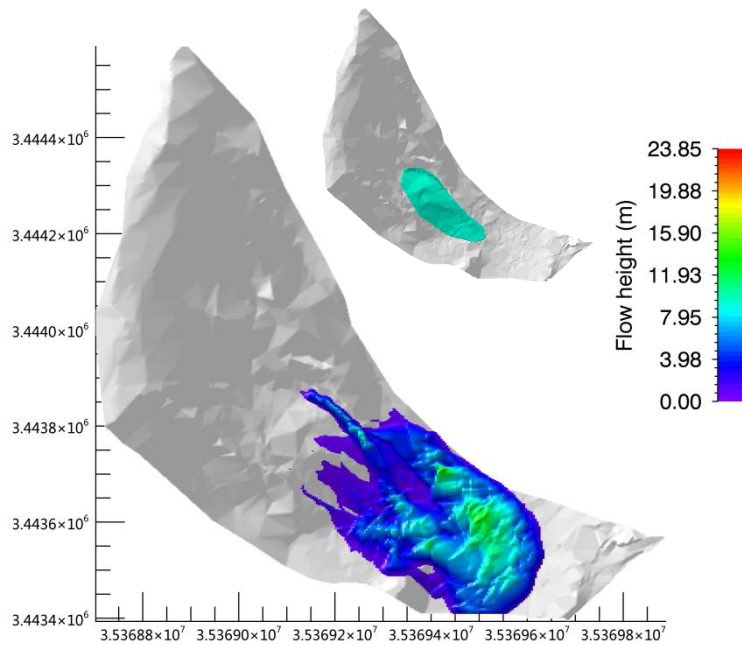

277

278

(a) Thickness– Flow height

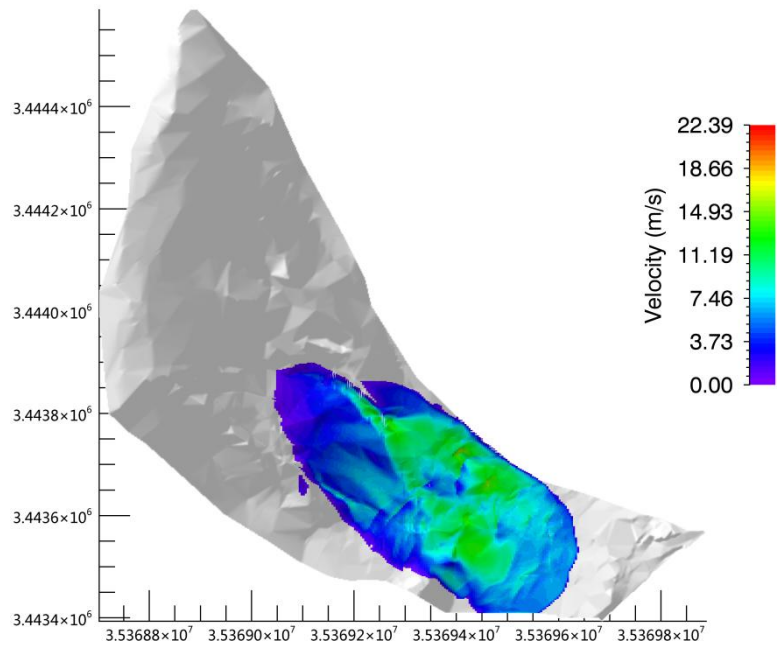

279

280

(b) Speed Velocity

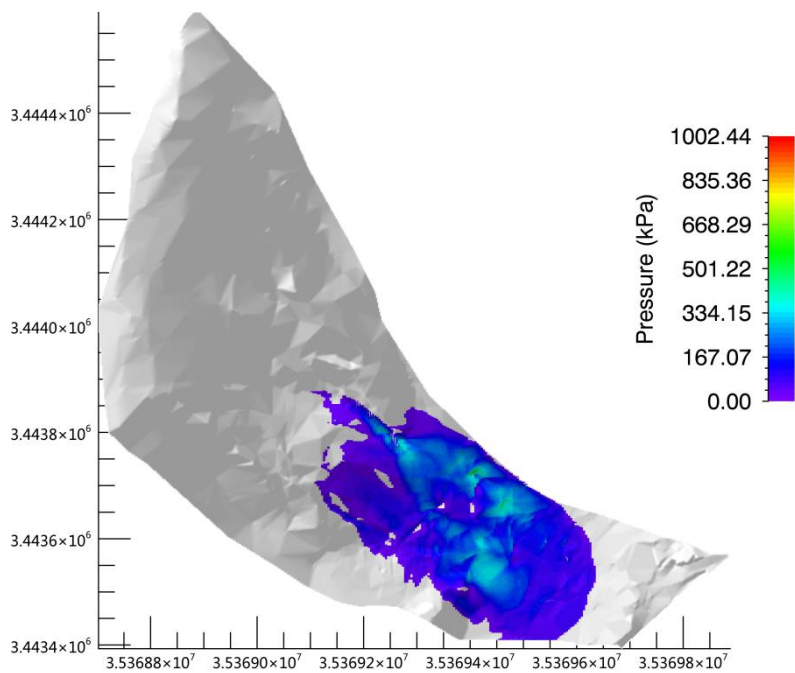

281

282

(c) Pressure

283 Fig.67 Movement characteristic parameters of Taziping landslide (before treatment)

284 See the kinematic characteristic parameters of the landslide deposits in Fig.6 7.

285 The coloredbar shows the maximum values of moving process or an instantaneous for

286 a given time step. As shown by the calculation results,  $\oplus$  deposits accumulated

287 during the landslide movement process had a maximum thickness flow height of

288 23.85m, located around the surface gully of the middle and upper slope. The middle

289 and lower of the landslide deposits had a thickness flow height of about 5-10m; ②  
 290 the middle and lower movement speed velocity of the landslide ranged from 3m/s and  
 291 7m/s; ③ the landslide had a mean pressure of about 500kPa, and the pressure of the  
 292 middle and lower deposits was about 200kPa. Thus, three-story and lower houses  
 293 within the deposition range might be buried, and it was further suggested that the  
 294 design strength of the gable walls of houses on the middle and upper parts of the  
 295 deposit be increased above 300kPa.

296

### 297 3.3 Hazard prediction after treatment

298 After fully accounting for the slide-resistant piles and mounds, we introduced the  
 299 Morgenstern-Price method (Morgenstern et al., 1965) to calculate the stability  
 300 coefficient of Taziping landslide after treatment. The method was determined with an  
 301 iterative approaching by changing the position of the sliding surface until failure of  
 302 the dumpsite (Fig.8). The physico-mechanical parameters under a saturated state  
 303 (Hydrologic Engineering and Geological Survey Institute of Hebei Province, 2010)  
 304 were adopted to search for the sliding plane of the landslide.

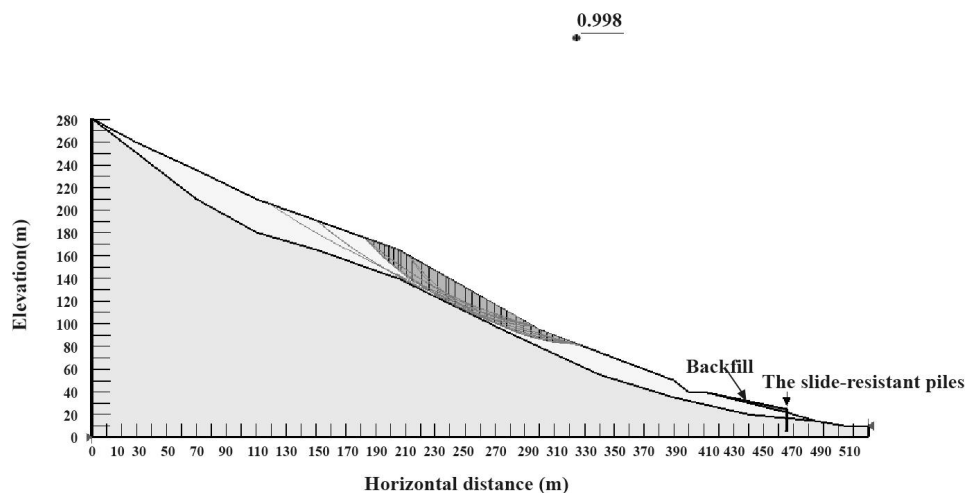

305

306 Fig.8 Search for the sliding plane of Taziping landslide (before treatment)

307 Based on the numerical analysis, the Taziping landslide stability coefficient was  
 308 0.998. it was found under rainfall conditions, the middle area of Taziping landslide was  
 309 unstable. Loose deposits in the middle part of the landslide might convert into  
 310 high-water landslide substances and cut out from the top of the slide-resistant piles. In  
 311 the damaged area, the slope had a rear edge wall elevation of about 1,170m. Its front  
 312 edge was located on the south side of the mountain road, with an elevation of about  
 313 ~~1,070m~~1,070-1,072m and a length of ~~about 180m~~182m. Thus, the scale of the  
 314 rainfall-damaged is estimated to be about 250,000m<sup>3</sup>, with a mean thickness of about  
 315 6m. The parameters in Tab.2 were again adopted for the simulated calculation.

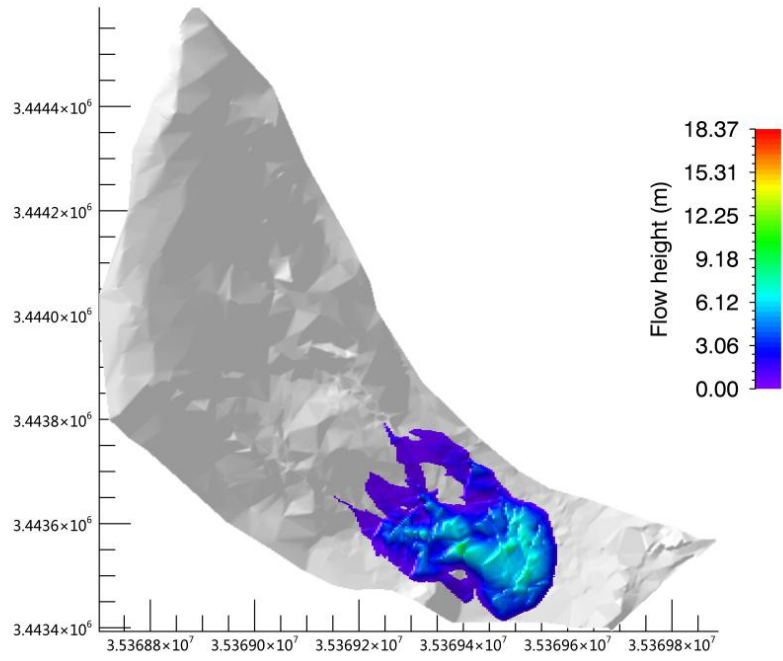

316

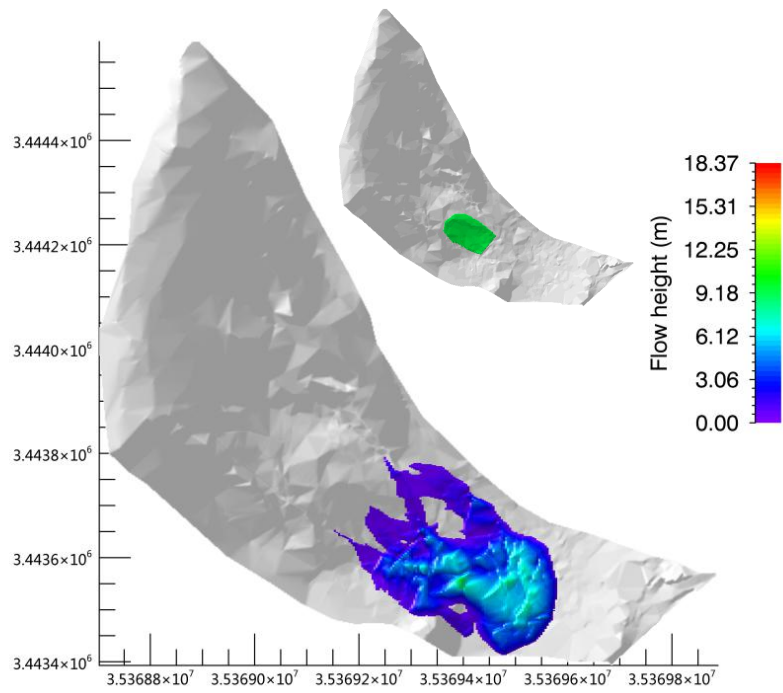

317

318

(a) Thickness– Flow height



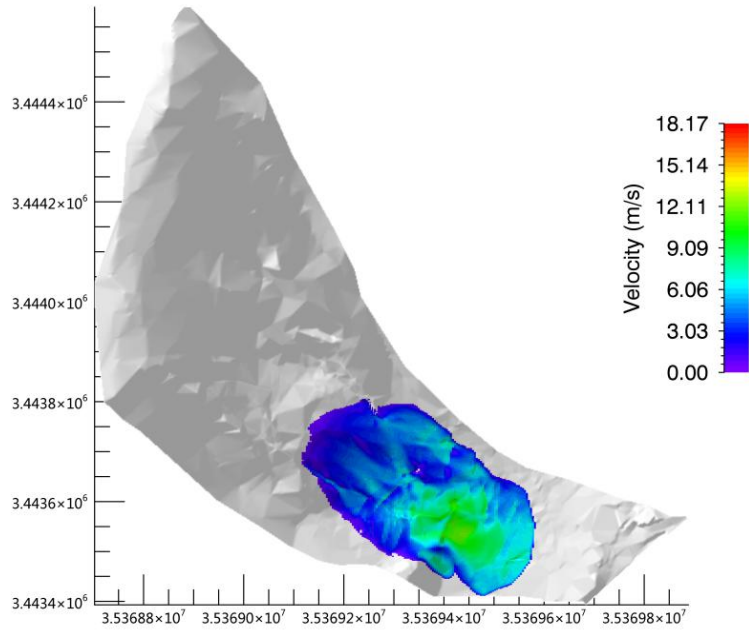

319  
320

(b) Speed Velocity

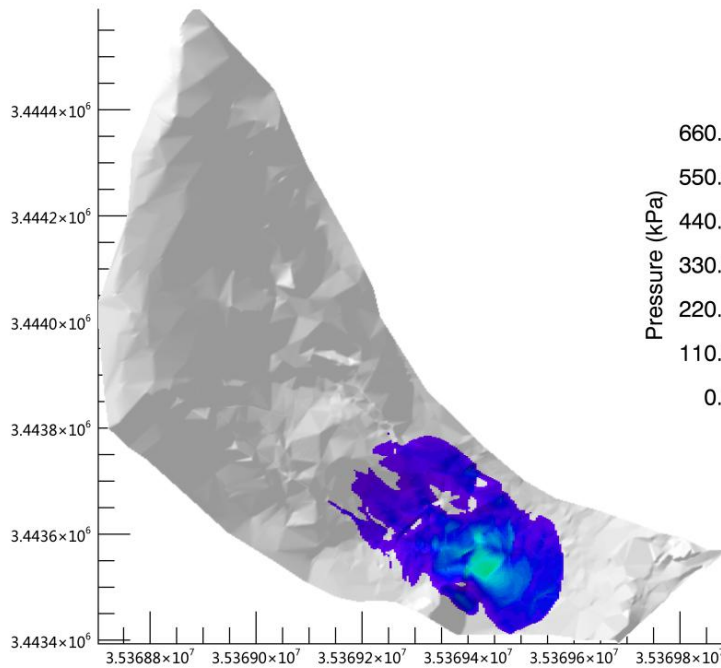

321  
322

(c) Pressure

Fig.7 9 Movement characteristic parameters of Taziping landslide (after treatment)

Provided in Fig.4 9 are the kinematic characteristics of the landslide deposit. The coloredbar shows the maximum values of moving process or an instantaneous for a given time step. ①—Deposits accumulated during the landslide movement process had a maximum thickness flow height of 18.37m, located around the surface gully of the middle and upper slope. Middle and lower of the landslide deposits had a thickness flow height of approximately 3-5m. ②— The middle and lower movement-speed

330 **velocity** of the landslide deposits ranged between 3m/s and 5m/s. ③—The landslide  
 331 had a mean pressure of about 330kPa, and the pressure of the middle and lower  
 332 deposits was about 100kPa. Thus, it could be held that two-story and lower houses  
 333 within the deposition range might be buried. It was further suggested that the design  
 334 strength of the gable walls of houses on the middle and upper parts of the deposits be  
 335 increased above 150kPa.

336 After treatment, the accumulation **thickness flow height** and pressure of the  
 337 deposits were reduced by about 1/2, and the kinematic speed was reduced by about  
 338 1/3. However, the Miaoba residential area of Red Village was still partially at hazard.  
 339

#### 340 **4 Results**

341 **Landslides reflect landscape instability that evolves over meteorological and**  
 342 **geological timescales, and they also pose threats to people, property, and the**  
 343 **environment. The severity of these threats depends largely on landslide speed and**  
 344 **travel distance. There may be examples where entire houses on a landslide mass are**  
 345 **moved but not destroyed because of stable base plates. In any case, velocity plays a**  
 346 **more important role regarding kinetic energy acting on an obstacle. However, the**  
 347 **Miaoba residential area of Red Village is located at the frontal part of Tazhiping**  
 348 **lanslide. Then, D**uring landslide movement, the spatial scale indexes of a landslide  
 349 mass include area, volume, and thickness. The maximum thickness of the landslide is  
 350 one of the direct factors influencing the building’s deformation failure status. A large  
 351 landslide displacement may lead to burial, collapse, or deformation failure of the  
 352 building, and thus influence its safety and stability. Thus, landslide thickness  
 353 constitutes an important index for assessing the hazards of a landslide disaster, and for  
 354 influencing the consequences faced by disaster-affected bodies (Fell et al., 2008;  
 355 DZ/T, 0286-2015). Provided in Tab.3 is a landslide thickness-based division of the  
 356 predicted hazard zones of Taziping landslide, in which the thickness of the landslide  
 357 mass correlates with the ability of a building to withstand a landslide disaster (Hung  
 358 et al., 1984; Petrazzuoli et al., 2004; GB, 50010–2010; Hu et al., 2012; Zeng et al.,  
 359 2015). After treatment with slide-resistant piles, the hazard of a future slide was  
 360 reduced by about 1/3 overall and by 2/3 in high-hazard zones.

361 **Tab.3 Division table of the predicted hazards of Taziping landslide (unit: m<sup>2</sup>)**

| <b>Hazard zone level</b> | <b>Assessment index</b> | <b>Building damage probability</b> | <b>Area before treatment</b> | <b>Area after treatment</b> | <b>Increased/decreased area</b> | <b>Building damage characteristics</b> |
|--------------------------|-------------------------|------------------------------------|------------------------------|-----------------------------|---------------------------------|----------------------------------------|
| <b>Low-hazard zone</b>   |                         |                                    |                              |                             |                                 | One-story houses                       |
| <b>(I)</b>               | $h \leq 0.5m$           | 20%                                | 44 , 600                     | 38 , 748                    | -5,852                          | may be damaged;<br>houses on the       |

---

|                         |                         |         |          |          |         |                                                                                                         |
|-------------------------|-------------------------|---------|----------|----------|---------|---------------------------------------------------------------------------------------------------------|
|                         |                         |         |          |          |         | landslide mass are partially damaged.                                                                   |
|                         |                         |         |          |          |         | One-story houses have a very high probability of being                                                  |
| <b>Relatively</b>       |                         |         |          |          |         | <del>washed-away</del>                                                                                  |
| <b>low-hazard zone</b>  | 0.5 m <                 | 50~20%  | 24 , 900 | 26 , 400 | +1,500  | damaged; one-story                                                                                      |
| <b>(II)</b>             | $h \leq 1\text{m}$      |         |          |          |         | houses on the landslide mass are completely damaged.                                                    |
|                         |                         |         |          |          |         | One-story to three-story houses have a very high probability of being                                   |
| <b>Moderate-hazard</b>  |                         |         |          |          |         | <del>washed-away</del>                                                                                  |
| <b>zone</b>             | 1m < $h \leq 3\text{m}$ | 80~50%  | 21 , 980 | 15 , 856 | -6,124  | damaged; houses less than three stories on the landslide mass are completely damaged.                   |
| <b>(III)</b>            |                         |         |          |          |         | One-story houses may be buried, and two-story to six-story houses have a very high probability of being |
| <b>Relatively</b>       |                         |         |          |          |         | <del>washed-away</del>                                                                                  |
| <b>high-hazard zone</b> | 3m < $h \leq 5\text{m}$ | 100~80% | 30 , 820 | 19 , 636 | -11,184 |                                                                                                         |
| <b>(IV)</b>             |                         |         |          |          |         |                                                                                                         |

---

**High-hazard**

**zone**  
**(V)**

$h \geq 5m$       100%      47 , 240    13 , 052      -34,188

Total area:      —      —      169 , 540    113 , 700      -54,340      —

damaged; houses on the landslide mass are completely damaged. Two-story and lower houses may be buried, and three-story and higher houses have a very high probability of being washed away damaged; houses on the landslide mass are completely damaged.

362      Given in Fig.8 10 are the 3D divisions of hazard zones of Taziping landslide  
 363 before and after engineering treatment. The scope of the hazard zones changed before  
 364 and after engineering treatment, particularly in the high-hazard zones. Before  
 365 treatment with slide-resistant piles, the landslide posed a great hazard to eight houses  
 366 on the left side of the upper Miaoba residential area, with high-hazard zone associated  
 367 with landslide mass height over 5m and red zone. After treatment, the number of  
 368 effected houses was reduced to four. We defined outside the colored area as  
 369 no-hazard.

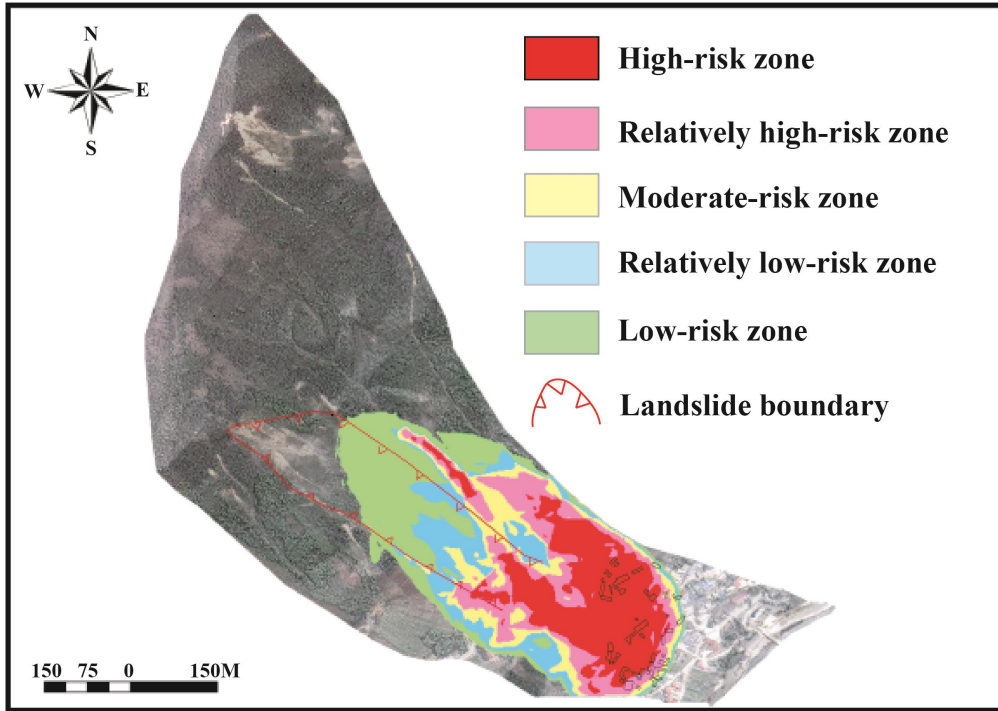

370

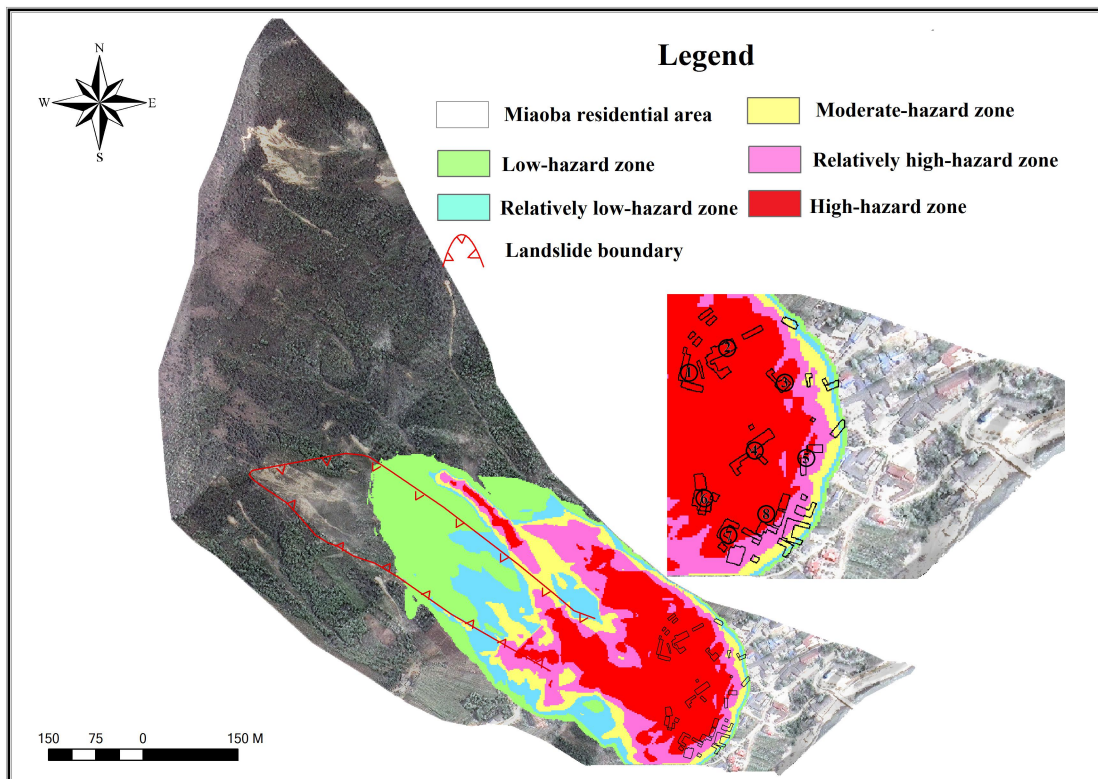

371

372

(a) Before treatment

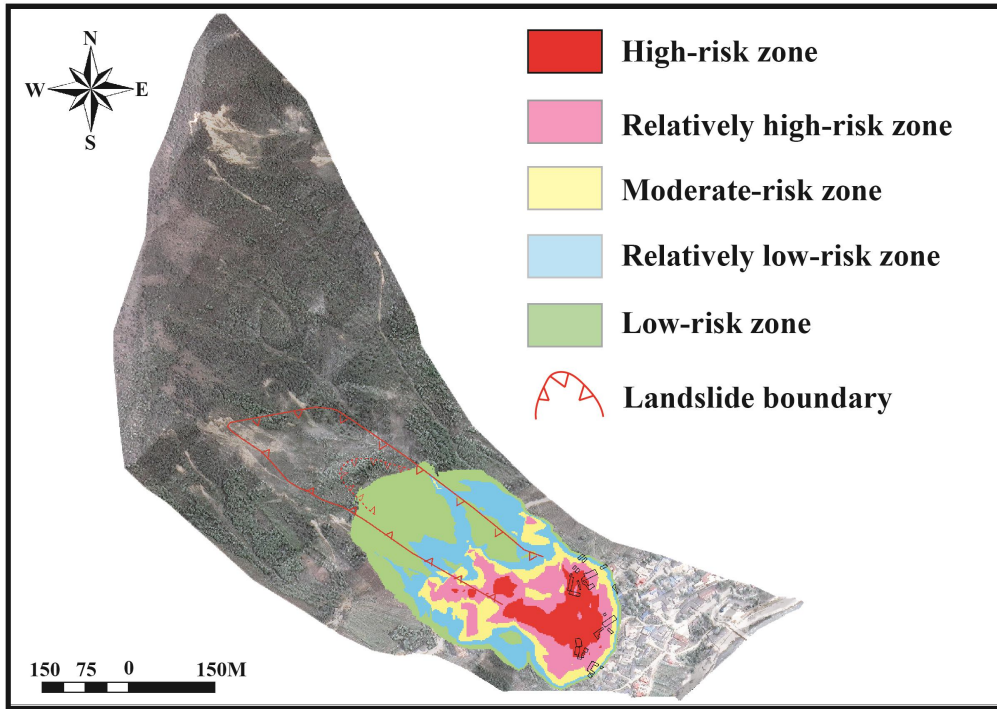

373

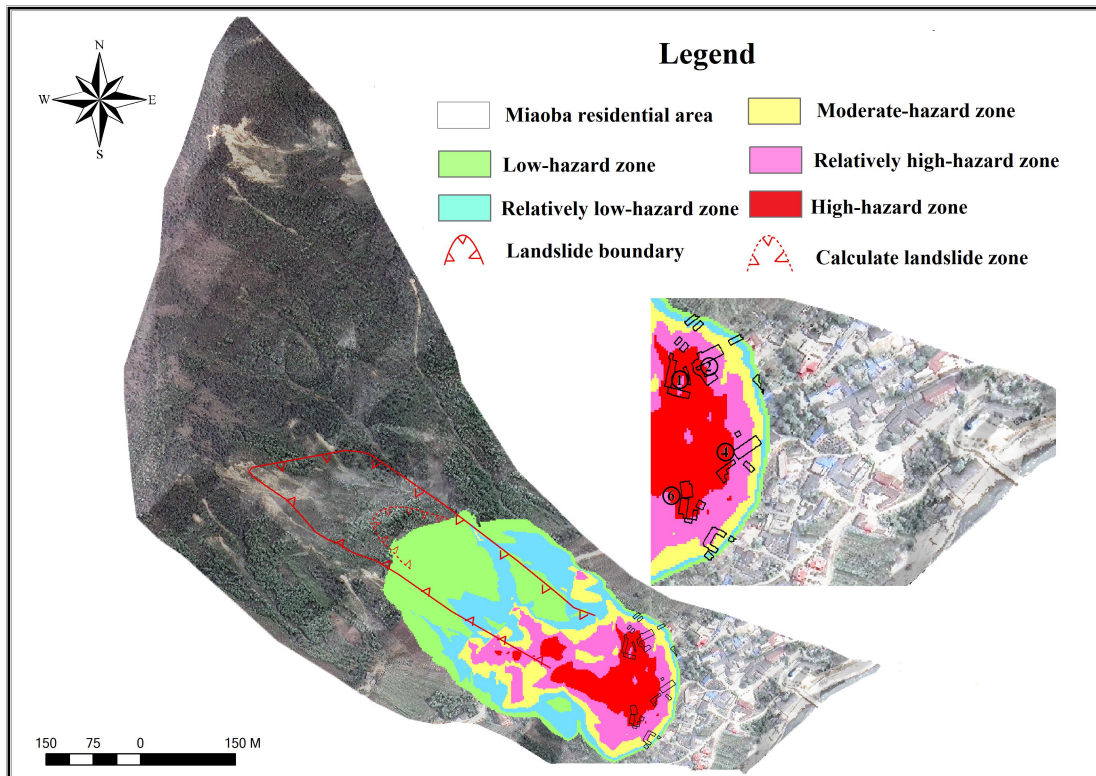

374

375

(e) After treatment

376

Fig.810 3D division comparison of the hazards of Taziping landslide

377

## 378 5 Conclusions and Discussion

379

The hazard assessment of landslide using numerical models is becoming more and more popular as new models developing and becoming available in both scientific

380

381 research and practical applications. There is some confusion about the mass  
382 movement process that is discussed and approached by the presented and adopted  
383 rheological model.

384 On the one hand, Landslides move downslope in many different ways (Varnes,  
385 1978). In addition landslides can evolve into rapidly travelling flows, which exhibit  
386 characteristics of debris flows on unchannelized or only weakly channelized hillslopes.  
387 The geomorphic heterogeneity of rapid shallow landslides such as hillslope debris  
388 flows is larger than observed in channelized debris flows, however many of these  
389 flows can be successfully modelled using the Voellmy-fluid friction relation and  
390 starting the flow as a block release (Christen et al., 2012 ). This paper simulation  
391 results support this option that Voellmy-fluid rheological model can also be used in  
392 the simulation of flow-type landslides.

393 On the other hand, The selection of model parameters remains one of the  
394 fundamental challenges for numerical calculations in natural hazards. At present, there  
395 are a high empirical parameters obtained from 30-year monitoring data on avalanche.  
396 Such as in RAMMS, we can automatically generate the friction coefficient of  
397 avalanche for our calculation domain based on topographic data analysis, forest  
398 information and global parameters and so on (WSL, 2013). The friction parameters of  
399 debris flow can found in some literature (Fannin et al., 2001; Iovine et al., 2003;  
400 Hürlimann et al., 2008; Scheidl et al., 2010; Huang et al., 2015). However, There are  
401 seldom cases researching on friction parameters of flow-type landslide. Therefore, we  
402 tested different coulomb friction coefficient  $\mu$  values ranging between  $0.1 \leq \mu \leq 0.6$

403 and viscous friction coefficient  $\zeta$  values ranging between  $100 \leq \mu \leq 1000 m \cdot s^{-2}$  .

404 Finally, we selected the coulomb friction coefficient  $\mu = 0.45$  and viscous friction  
405 coefficient  $\zeta = 500 m \cdot s^{-2}$  in accordance with back-analyses of well-documented  
406 landslide cases (Cepeda et al., 2010; Du et al., 2015 ). The results of the simulation  
407 results is consistent with the field observation in terms of topography and sliding path.

408 Based on the finite volume method and program RAMMS, the simulation results  
409 of Taziping landslide were consistent with the sliding path predicted by the field  
410 investigation. This correlation indicates that numerical simulation is an effective  
411 method for studying the movement processes of flow-type landslide-debris flows. The  
412 accumulation thickness flow height and pressure of landslide deposits were reduced  
413 by about 1/2, and the kinematic speed was reduced by about 1/3 after treatment.  
414 However, the Miaoba residential area of Red Village is still partially at hazard.  
415 Considering that two-story and lower houses within the deposition range might be  
416 buried, it was further suggested that the design strength of the gable walls of houses  
417 on the middle and upper parts of the deposit be increased above 150kPa.

418 By utilizing a GIS platform in combination with landslide hazard assessment  
419 indexes, we mapped the 3D division of the Taziping landslide hazard zones before  
420 and after engineering treatment. The results indicated that overall hazard zones

421 contracted after engineering treatment and, the area of high-hazard zones was reduced  
422 by about 2/3. After engineering treatment, the number of at hazard houses on the left  
423 side of the upper Miaoba residential area, was reduced from eight to four. It was thus  
424 clear that some zones are still at high hazard despite engineering treatment. Therefore,  
425 it was proposed that houses located in high-hazard zones be relocated or reinforced  
426 for protection.

427

428

429

### 430 **Acknowledgments**

431 First of all, the authors give sincere acknowledgement to CAS Pioneer Hundred  
432 Talents Program for the completion of this research. Also this work was supported by  
433 National Natural Science Foundation of China (Grant No. 41301009) and the  
434 Hundred Young Talents Program of IMHE (SDSQB-2016-01), the International  
435 Cooperation Program of the Ministry of Science and Technology of China (Grant  
436 No.2013DFA21720). The authors express their deepest gratitude to those aids and  
437 assistances. **The authors also extend their gratitude to editor and two anonymous**  
438 **reviewers for their helpful suggestions and insightful comments, which have**  
439 **contributed greatly in improving the quality of the manuscript.**

440

441

### 442 **Reference**

443 Bartelt, P., Bühler, Y., Buser, O., Christen, M., and Meier, L.: Modeling mass-dependent flow  
444 regime transitions to predict the stopping and depositional behavior of snow avalanches, *J.*  
445 *Geophys. Res.*, 117, F01015, doi:10.1029/2010JF001957, 2012 .

446 Costa, J.E.: Physical geomorphology of debris flows. *Developments and Applications of*  
447 *Geomorphology*, Springer Press., 268-317, 1984.

448 Christen, M., Kowalski, J., and Bartelt, P.: RAMMS: Numerical simulation of dense snow  
449 avalanches in three-dimensional terrain, *Cold Regions Science and Technology.*, 63, 1–14,  
450 2010.

451 Christen, M., Bartelt, P., and Kowalski, J.: Back calculation of the In den Arelen avalanche with  
452 RAMMS: interpretation of model results, *Annals of Glaciology.*, 51, 161–168, 2010.

453 **Christen, M., Bühler, Y., Bartelt, P., Leine, R., Glover, J., Schweizer, A., Graf, C., McArdeLL, B.,**  
454 **Gerber, W., Deubelbeiss, Y., Feistl, T., and Volkwein, A.: Integral hazard management using a**  
455 **unified software environment: numerical simulation tool “RAMMS” for gravitational natural**  
456 **hazards, In: Koboltschnig, G., Hübl, J., Braun, J. (eds.) Proceedings of 12th Congress**  
457 **INTERPRAE., 1, 77–86, 2012.**

458 **Chen, J.C., and Chuang, M.R.: Discharge of landslide-induced debris flows: case studies of**  
459 **Typhoon Morakot in southern Taiwan, *Nat. Hazards Earth Syst. Sci.*, 14, 1719-1730, 2014.**

460 **Cepeda, J., Chávez, J.A., and Martínez, C.C.: Procedure for the selection of runout model**  
461 **parameters from landslide back-analyses : application to the Metropolitan Area of San**  
462 **Salvador, El Salvador, *Landslides.*, 7, 105–116, 2010.**

463 Du, J., Yin, K.L., and Wang, J.J.: Simulation of three-dimensional movement of landslide-debris



464 flow based on finite volume method, *Chinese Journal of Rock Mechanics and Engineering.*,  
465 34: 480–488, 2015 (in Chinese).

466 Evans, S.G., Tutubalina, O.V., Drobyshev, V.N., Chernomorets, S.S., McDougall, S., Petrakov,  
467 D.A., and Hungr, O.: Catastrophic detachment and high-velocity long-runout flow of Kolka  
468 Glacier, Caucasus Mountains, Russia in 2002, *Geomorphology.*, 105, 314–321, 2009.

469 Fannin, R.J., and Wise, M.P.: An empirical-statistical model for debris flow travel distance,  
470 *Canadian Geotechnical Journal.*, 38, 982–994, 2001.

471 Finlay, P.J., Mostyn, G.R., and Fell, R.: Landslide risk assessment: prediction of travel distance,  
472 *Canadian Geotechnical Journal.*, 36, 556–562, 1999.

473 Fell, R., Corominas, J., Bonnard, C., Cascini, L., Leroi, E., and Savage, W. Z.: Guidelines for  
474 landslide susceptibility, hazard and risk zoning for land use planning, *Engineering Geology.*,  
475 102, 85–98, 2008.

476 Fannin, R., and Wise, M.: An empirical-statistical model for debris flow travel distance, *Can  
477 Geotech J.*, 38, 982–994, 2001.

478 GB 50010–2010.: Code for design concrete structures, Beijing: Chinese Architectural Industry.,  
479 34–80, 2010 (in Chinese).

480 Hebei Province Institute of Hydrogeological and Engineering.: Geological investigation  
481 engineering supplemental survey report of Hongse Village Taziping landslide in Hongkou  
482 Town of Dujiangyan City, Sichuan Province., 2010 (in Chinese).

483 Hungr, O.: A Model for the runout analysis of rapid flow slides, debris flows and avalanches, *Can  
484 Geotech J.*, 32, 610–623, 1995.

485 Hungr, O., Evans, S.G., Bovis, M.J., and Hutchinson, J.N.: A review of the classification of  
486 landslides of the flow type, *Environ Eng Geosci.*, 7, 221–238, 2001.

487 Hungr, O., Morgan G.C., and Kellerhals, R.: Quantitative analysis of debris torrent hazards for  
488 design of remedial measures, *Can Geotech J.*, 21, 663–677, 1984.

489 Hu, K.H., Cui, P., and Zhang, J.Q., Characteristics of damage to buildings by debris flows on 7  
490 August 2010 in Zhouqu, Western China, *Nat Hazards Earth Syst Sci.*, 12, 2209–2217, 2012.

491 Hürlimann, M., Rickenmann, D., Medina, V., and Bateman, A.: Evaluation of approaches to  
492 calculate debris-flow parameters for hazard assessment, *Eng Geol.*, 102, 152–163, 2008.

493 Huang, Y., Cheng, H., Dai, Z., Xu, Q., Liu, F., Sawada, K., Moriguchi, S., and Yashima, A.:  
494 SPH-based numerical simulation of catastrophic debris flows after the 2008 Wenchuan  
495 earthquake, *Bull Eng Geol Environ.*, 74, 1137–1151, 2015.

496 Iverson, R. M., Reid, M. E., and LaHusen, R. G.: Debris-flow mobilization from landslides, *Annu.  
497 Rev. Earth Planet Sc.*, 25, 85– 138, 1997.

498 Iverson, R.M., and Vallance, J.W.: New views of granular mass flows, *Geology.*, 29, 1115–1118,  
499 2001.

500 Iovine, G., Gregorio, S.D., and Lupiano, V.: Debris-flow susceptibility assessment through cellular  
501 automata modeling: an example from 15–16 December 1999 disaster at Cervinara and San  
502 Martino Valle Caudina (Campania, southern Italy), *Nat Hazards Earth Syst Sci.*, 3, 457–468,  
503 2003.

504 Jackson, L.E., Kostashuk, R.A., and MacDonald, G.M.: Identification of debris flow hazard on  
505 alluvial fans in the Canadian Rocky mountains, *Geological Society of America.*, 7, 155–124,  
506 1987.

507 LeVeque, R.: *Finite Volume Methods for Hyperbolic Problems*, Cambridge Texts in Applied

508 Mathematics Cambridge University Press., 2002.

509 ~~Michael, L.M., 2003. Baynes F, Scott G, Granger K Regional landslide risk to the Cairns~~  
510 ~~community[J]. Nat Hazards, 2003, 30 (2): 233-249.~~

511 Michael-Leiba, M., Baynes, F., Scott, G., and Granger, K.: Regional landslide risk to the Cairns  
512 community, Nat Hazards., 30, 233–249, 2003.

513 Morgenstern, N.R., and Price, V.E.: The analysis of the stability of general slip surfaces,  
514 Geotechnique., 15, 79–93, 1965.

515 Portilla, M., Chevalier, G., and Hürlimann, M.: Description and analysis of the debris flows  
516 occurred during 2008 in the Eastern Pyrenees, Nat. Hazards Earth Syst. Sci., 10, 1635–1645,  
517 2010.

518 Petrazzuoli, S.M., and Zuccaro, G.: Structural resistance of reinforced concrete buildings under  
519 pyroclastic flows: a study of the Vesuvian area, J Volcanol Geoth Res., 133, 353–367, 2004.

520 Sassa, K., Nagai, S., Solidum, R., Yamazaki, Y., and Ohta, H.: An integrated model simulating the  
521 initiation and motion of earthquake and rain induced rapid landslides and its application to  
522 the 2006 Leyte landslide, Landslides., 7, 219–236, 2010.

523 Scott, K.M., and Vallance, J.W.: History of Landslides and Debris Flows at Mount Rainier: Water  
524 Fact Sheet, USGS Open-File Report., 93–111, 1993.

525 Shi, G.H.: Discontinuous deformation analysis - a new numerical model for the statics and  
526 dynamics of block system, Berkeley: University of California., 1988.

527 ~~DZ/T 0286-2015.: Specification of risk assessment for geological hazard, Ministry of Land and~~  
528 ~~Resources of the People's Republic of China., 2015 (in Chinese).~~

529 Scheidl, C., and Rickenmann, D.: Empirical prediction of debris-flow mobility and deposition on  
530 fans, Earth Surf Proc Land., 35, 157–173, 2010.

531 Toro, E.F.: Riemann problems and the waf method for solving the two dimensional shallow water  
532 equations. Philos. Trans. R. Soc. London., Ser. A 338, 43–68, 1992.

533 Varnes, D.J., : Slope movement types and processes. In: Schuster RL, Krizek RJ (eds) Landslides:  
534 analysis and control. Transportation Research Board, National Research Council, Washington,  
535 DC, USA., 11–33 , 1978.

536 Wang, L., Li, B., Gao, Y., and Zhu, S.: Run-out prediction of large thick-bedded unstable rock: A  
537 case study of Daxiang unstable rock in Yangjiao town, Wulong county, Chongqing, Earth  
538 Science Frontiers., 23, 251–259, 2016 (in Chinese).

539 WSL.: RAMMS: A numerical model for snow avalanches in research and practice, User manual  
540 v1.5 avalanche, WSL Institute for snow and avalanche research SLF, Swiss., 2013.

541 ~~Yin, K.L., Jiang, Q.H., and Wang, Y.: Simulation of Landslide Movement Process by~~  
542 ~~Discontinuous Deformation Analysis, Earth Science Journal of China University of~~  
543 ~~Geosciences, 27, 632-636, 2002 (in Chinese).~~

544 ~~Zhang, Y.J.: Study on dynamic characteristics of typical rock avalanche on canyon area, Shanghai~~  
545 ~~Jiao Tong University, 2013 (in Chinese).~~

546 ~~Zhang, Z.Y., Wang, S.T., Wang, L.S., Huang, R.Q., Xu, Q., and Tao, L.J.: Principles of~~  
547 ~~engineering geology, Beijing: Geology Press., 212-224, 1993 (in Chinese).~~

548 Zeng, C., Cui, P., Su, Z.M., Lei, Y., Chen, R.: Failure modes of reinforced concrete columns of  
549 buildings under debris flow impact, Landslides., 12, 561-571, 2015.
